# Supplementary material
Source: PubMed Central journal article supplement (PMC2846823)
Supplement: NIHMS152979-supplement-01.pdf [file NIHMS152979-supplement-01.pdf]

**Table S1: Protein and Nucleotide Identities Among Paralogues in the GMCMV(2715) vCXCL Gene Cluster**

|                | <b>Nucleotide (%)</b>         |                |               |                |                |               |               |               |
|----------------|-------------------------------|----------------|---------------|----------------|----------------|---------------|---------------|---------------|
| <b>Gene</b>    | <b>vCXCL1A</b>                | <b>vCXCL1B</b> | <b>vCXCL2</b> | <b>vCXCL3A</b> | <b>vCXCL3B</b> | <b>vCXCL4</b> | <b>vCXCL5</b> | <b>vCXCL6</b> |
| <b>vCXCL1A</b> | --                            | 70             | 37            | 24             | 28             | 27            | 31            | 39            |
| <b>vCXCL1B</b> | 52                            | --             | 37            | 25             | 27             | 31            | 34            | 38            |
| <b>vCXCL2</b>  | 20                            | 22             | --            | 30             | 29             | 31            | 39            | 32            |
| <b>vCXCL3A</b> | 15                            | 16             | 21            | --             | 45             | 36            | 35            | 25            |
| <b>vCXCL3B</b> | 13                            | 16             | 21            | 35             | --             | 46            | 36            | 26            |
| <b>vCXCL4</b>  | 13                            | 14             | 23            | 28             | 34             | --            | 40            | 25            |
| <b>vCXCL5</b>  | 18                            | 19             | 25            | 16             | 23             | 18            | --            | 22            |
| <b>vCXCL6</b>  | 16                            | 18             | 18            | 14             | 15             | 20            | 21            | --            |
|                | <b>Protein (Amino Acid) %</b> |                |               |                |                |               |               |               |
