# Supplementary material
Source: PubMed Central journal article supplement (PMC2846823)
Supplement: NIHMS152979-supplement-02.pdf [file NIHMS152979-supplement-02.pdf]

**Table S2: Protein and Nucleotide Identities Among Primate CMV Orthologues of GMCMV(2715) vCXCL1**

|                   | <b>Nucleotide (%)</b>         |                |                |                |                |                |               |               |               |
|-------------------|-------------------------------|----------------|----------------|----------------|----------------|----------------|---------------|---------------|---------------|
| <b>Virus</b>      | <b>2715</b>                   | <b>2715*</b>   | <b>2757</b>    | <b>Colburn</b> | <b>4915</b>    | <b>Stealth</b> | <b>Baboon</b> | <b>Rhesus</b> | <b>Chimp</b>  |
| <b>Gene</b>       | <b>vCXCL1A</b>                | <b>vCXCL1B</b> | <b>vCXCL1A</b> | <b>vCXCL1A</b> | <b>vCXCL1A</b> | <b>vCXCL1A</b> | <b>vCXCL1</b> | <b>vCXCL1</b> | <b>vCXCL1</b> |
| <b>2715 1A</b>    | --                            | 70             | 92             | 91             | 91             | 91             | 56            | 43            | 39            |
| <b>2715 1B*</b>   | 52                            | --             | 72             | 70             | 72             | 72             | 54            | 44            | 35            |
| <b>2757 1A</b>    | 88                            | 55             | --             | 93             | 89             | 89             | 56            | 43            | 40            |
| <b>Colburn 1A</b> | 87                            | 52             | 93             | --             | 89             | 90             | 55            | 42            | 39            |
| <b>4915 1A</b>    | 84                            | 51             | 80             | 80             | --             | 99             | 55            | 43            | 42            |
| <b>Stealth 1A</b> | 85                            | 51             | 80             | 81             | 99             | --             | 55            | 44            | 42            |
| <b>Baboon 1</b>   | 36                            | 40             | 36             | 35             | 35             | 36             | --            | 37            | 39            |
| <b>Rhesus 1</b>   | 31                            | 35             | 31             | 30             | 33             | 33             | 34            | --            | 41            |
| <b>Chimp 1</b>    | 20                            | 26             | 21             | 20             | 19             | 22             | 23            | 25            | --            |
|                   | <b>Protein (Amino Acid) %</b> |                |                |                |                |                |               |               |               |

\* Identities for 2715 vCXCL1B versus 2757 and Colburn vCXCL1B are 97/97 and 97/97
