# Supplementary material
Source: PubMed Central journal article supplement (PMC2846823)
Supplement: NIHMS152979-supplement-03.pdf [file NIHMS152979-supplement-03.pdf]

**Table S3: Protein and Nucleotide Identities Among Primate CMV Orthologues of GMCMV(2715) vCXCL4**

|                | <b>Nucleotide (%)</b>         |             |                |             |                |               |               |
|----------------|-------------------------------|-------------|----------------|-------------|----------------|---------------|---------------|
| <b>Gene</b>    | <b>2715</b>                   | <b>2757</b> | <b>Colburn</b> | <b>4915</b> | <b>Stealth</b> | <b>Baboon</b> | <b>Rhesus</b> |
| <b>2715</b>    | --                            | 44          | 51             | 46          | 48             | 74            | 47            |
| <b>2757</b>    | 35                            | --          | 53             | 54          | 58             | 40            | 45            |
| <b>Colburn</b> | 37                            | 42          | --             | 72          | 73             | 47            | 49            |
| <b>4915</b>    | 33                            | 40          | 65             | --          | 94             | 43            | 48            |
| <b>Stealth</b> | 33                            | 40          | 65             | 100         | --             | 44            | 51            |
| <b>Baboon</b>  | 53                            | 27          | 35             | 29          | 29             | --            | 47            |
| <b>Rhesus</b>  | 29                            | 37          | 33             | 34          | 34             | 27            | --            |
|                | <b>Protein (Amino Acid) %</b> |             |                |             |                |               |               |
