# Supplementary material
Source: PubMed Central journal article supplement (PMC2846823)
Supplement: NIHMS152979-supplement-04.pdf [file NIHMS152979-supplement-04.pdf]

**Table S4: Protein and Nucleotide Identities Among Paralogues in the GMCMV(4915) vGPCR Gene Cluster**

|                | <b>Nucleotide (%)</b>         |               |                |                |               |                |
|----------------|-------------------------------|---------------|----------------|----------------|---------------|----------------|
| <b>Gene</b>    | <b>vGPCR1</b>                 | <b>vGPCR2</b> | <b>vGPCR3A</b> | <b>vGPCR3B</b> | <b>vGPCR4</b> | <b>vGPCR5*</b> |
| <b>vGPCR1</b>  | --                            | 42            | 38             | 45             | 39            | 43             |
| <b>vGPCR2</b>  | 23                            | --            | 41             | 48             | 52            | 42             |
| <b>vGPCR3A</b> | 18                            | 23            | --             | 58             | 39            | 37             |
| <b>vGPCR3B</b> | 23                            | 31            | 45             | --             | 47            | 43             |
| <b>vGPCR4</b>  | 22                            | 37            | 24             | 33             | --            | 42             |
| <b>vGPCR5*</b> | 24                            | 28            | 19             | 25             | 24            | --             |
|                | <b>Protein (Amino Acid) %</b> |               |                |                |               |                |

\* Not including the S/T-rich N-terminal extension
