# Supplementary material
Source: PubMed Central journal article supplement (PMC2846823)
Supplement: NIHMS152979-supplement-05.pdf [file NIHMS152979-supplement-05.pdf]

**Table S5: Protein and Nucleotide Identities Among Primate CMV Orthologues of GMCMV(4915) vGPCR3A**

| Gene              | Nucleotide (%)         |               |                 |              |             |             |            |               |               |
|-------------------|------------------------|---------------|-----------------|--------------|-------------|-------------|------------|---------------|---------------|
|                   | 4915 vGPCR3A           | 4915* vGPCR3B | Stealth vGPCR3A | 9610 vGPCR3A | 2715 vGPCR3 | 2757 vGPCR3 | SA6 vGPCR3 | Baboon vGPCR3 | Rhesus vGPCR3 |
| <b>4915 3A</b>    | --                     | 58            | 99              | 81           | 58          | 58          | 58         | 54            | 54            |
| <b>4915 3B*</b>   | 44                     | --            | 58              | 58           | 92          | 91          | 91         | 67            | 59            |
| <b>Stealth 3A</b> | 98                     | 43            | --              | 81           | 58          | 58          | 58         | 47            | 54            |
| <b>9610 3A</b>    | 68                     | 46            | 68              | --           | 58          | 58          | 57         | 54            | 52            |
| <b>2715 3</b>     | 44                     | 90            | 44              | 46           | --          | 97          | 97         | 58            | 50            |
| <b>2757 3</b>     | 43                     | 89            | 46              | 44           | 97          | --          | 96         | 66            | 59            |
| <b>SA6 3</b>      | 44                     | 89            | 43              | 45           | 98          | 96          | --         | 67            | 60            |
| <b>Baboon 3</b>   | 40                     | 58            | 40              | 40           | 58          | 66          | 59         | --            | 60            |
| <b>Rhesus 3</b>   | 38                     | 50            | 38              | 35           | 51          | 51          | 51         | 50            | --            |
|                   | Protein (Amino Acid) % |               |                 |              |             |             |            |               |               |

\* Identities for 4915 vGPCR3B versus Stealth and 9610 vGPCR3B are 97/98 and 90/92
